# Supplementary material
Source: publisher site journal article supplement (https://www.kjim.org/upload/media/kjim-2022-280_suppl1.pdf)

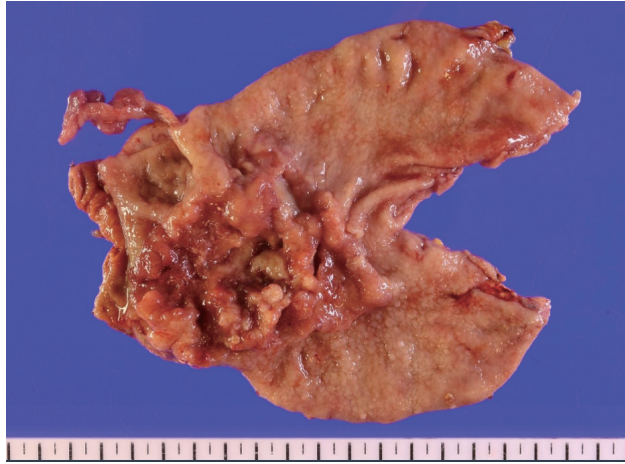

**Supplementary Figure 1.** Surgical specimen of curative Billroth II subtotal gastrectomy.

Supplement: Supplementary file 1 [file kjim-2022-280_suppl1.pdf]
